# Supplementary material for: Structure-directing synthesis of porous CuO–SiO2nanocomposites using carbon nitride
Source: Royal Society of Chemistry journal article supplement (doi:10.1039/d4ce00183d), 2024-01-01
Supplement: d4ce00183d1.pdf [file d4ce00183d1.pdf]

## Supplementary Information

### Structure-directing synthesis of porous CuO–SiO<sub>2</sub> nanocomposites using carbon nitride

Yuki Takeuchi,<sup>a</sup> Yasuhiro Toyoda,<sup>b</sup> Kazuma Gotoh<sup>b</sup> and Takahiro Ohkubo<sup>\*a</sup>

<sup>a</sup> Graduate School of Natural Science and Technology, Okayama University, 3-1-1 Tsushimanaka, Kita-ku, Okayama 700-8530, Japan

<sup>b</sup> Center for Nano Materials and Technology, Japan Advanced Institute of Science and Technology (JAIST), 1-1 Asahidai, Nomi, Ishikawa, 923-1292, Japan

#### Figure and table

**Fig. S1** XRD patterns for urea and U400.

**Fig. S2** a) XPS survey scan, and high-resolution XPS spectra in b) C 1s region and c) N 1s region for U400.

**Fig. S3** XRD patterns for Cu(OAc)<sub>2</sub>·H<sub>2</sub>O, PSS, and PSS/Cu 90°C.

**Fig. S4** XRD patterns for each U400/PSS<sub>x</sub>/Cu 90°C.

**Fig. S5** XRD patterns for each U400/PSS<sub>x</sub>/Cu 550°C.

**Table S1** Widths at half-maximum intensity of each peak in U400/PSS250/Cu 550°C and Cu(OAc)<sub>2</sub>·H<sub>2</sub>O 550°C.

**Fig. S6** XPS survey scan for U400/PSS250/Cu 90°C and U400/PSS250/Cu 550°C.

**Fig. S7** XPS survey scan for U400/PSS250/Cu 90°C, U400/PSS250/Cu 550°C, and Cu(OAc)<sub>2</sub>·H<sub>2</sub>O 550°C in kinetic energy scale.

**Fig. S8** High-resolution XPS spectra in Si 2p region for U400/PSS250/Cu 90°C and U400/PSS250/Cu 550°C.

**Table S2** Calculated Auger parameters.

**Table S3** The element ratio of Si and Cu in U400/PSS250/Cu 550°C.

**Table S4** The element ratio of Si and Cu in U400/PSS500/Cu 550°C.

**Table S5** The element ratio of Si and Cu in U400/PSS1500/Cu 550°C.

**Table S6** Experimental yields of U400/PSS<sub>x</sub>/Cu 550°C and theoretical yields of CuO and SiO<sub>2</sub>.

**Fig. S9** N<sub>2</sub> adsorption–desorption isotherms of each U400/PSS<sub>x</sub>/Cu 550°C.

**Fig. S10** BJH pore size distributions of a) U400/PSS250/Cu 550°C, b) U400/PSS500/Cu 550°C, and c) U400/PSS1500/Cu 550°C.

**Table S7** Specific surface areas of each material.

**Table S8** Comparative table from the literature in porosity.

**Fig. S11** Optical band gaps of U400/PSS500/Cu 550°C, U400/PSS1500/Cu 550°C, and Cu(OAc)<sub>2</sub>·H<sub>2</sub>O 550°C determined with the plots of  $[F(R^\infty)/hv]^{1/2}$  versus photon energy ( $h\nu$ ).

**Table S9** Comparative table from the literature in band gap.

**Table S10** The element ratio of Si and Cu in PSS/Cu 550°C.

**Fig. S12** High-resolution XPS spectra in the N 1s region for a) U400/Cu 550°C, b) U400/PSS 550°C, c) U400/PSS500/Cu 550°C, and d) the background (Cu(OAc)<sub>2</sub>·H<sub>2</sub>O 550°C).

**Fig. S13** SEM images of Cu(OAc)<sub>2</sub>·H<sub>2</sub>O 550°C.

**Fig. S14** The N<sub>2</sub> adsorption isotherm of U400/Cu 550°C.

**Fig. S15** High-resolution XPS spectra in a) Cu 2p region, b) N 1s region, and c) Si 2p region for U400/PSS1500/Cu 90°C and the samples obtained by calcinating U400/PSS1500/Cu 90°C at different conditions.

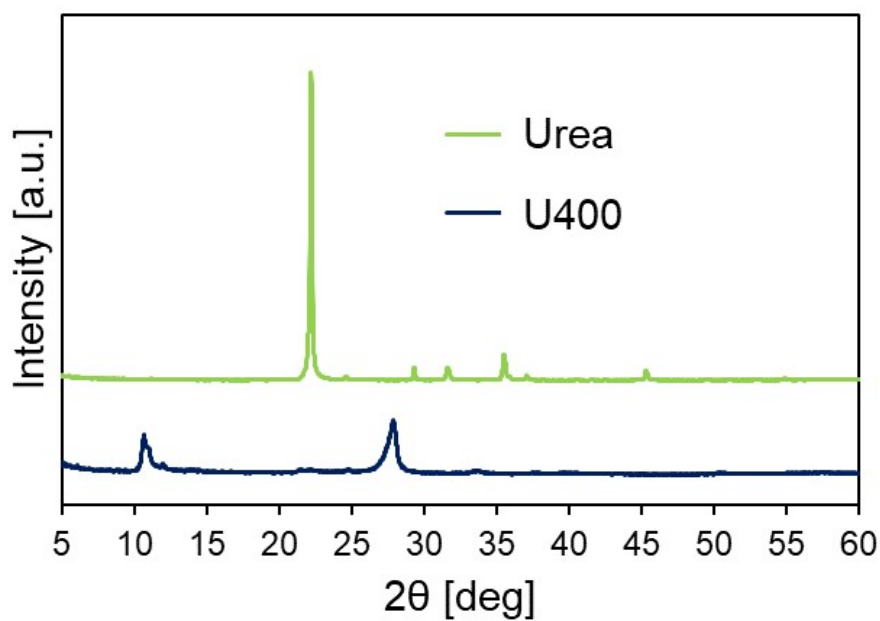

**Fig. S1** XRD patterns for urea and U400.

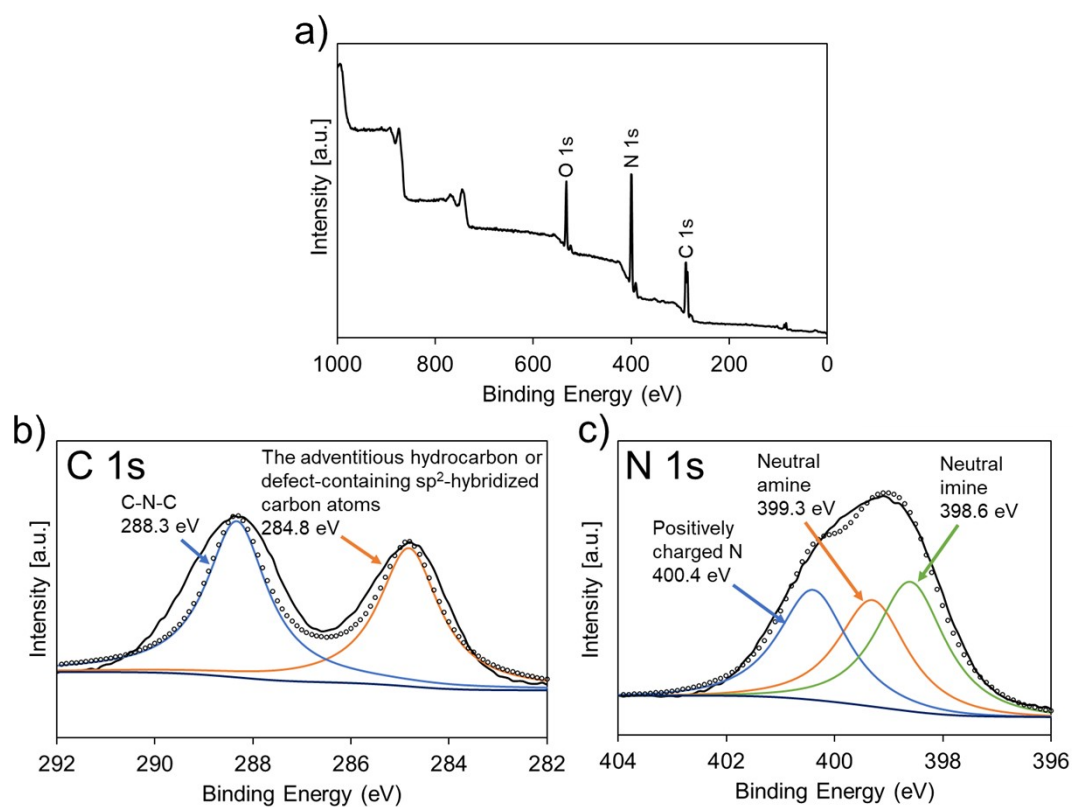

**Fig. S2** a) XPS survey scan, and high-resolution XPS spectra in b) C 1s region and c) N 1s region for U400.

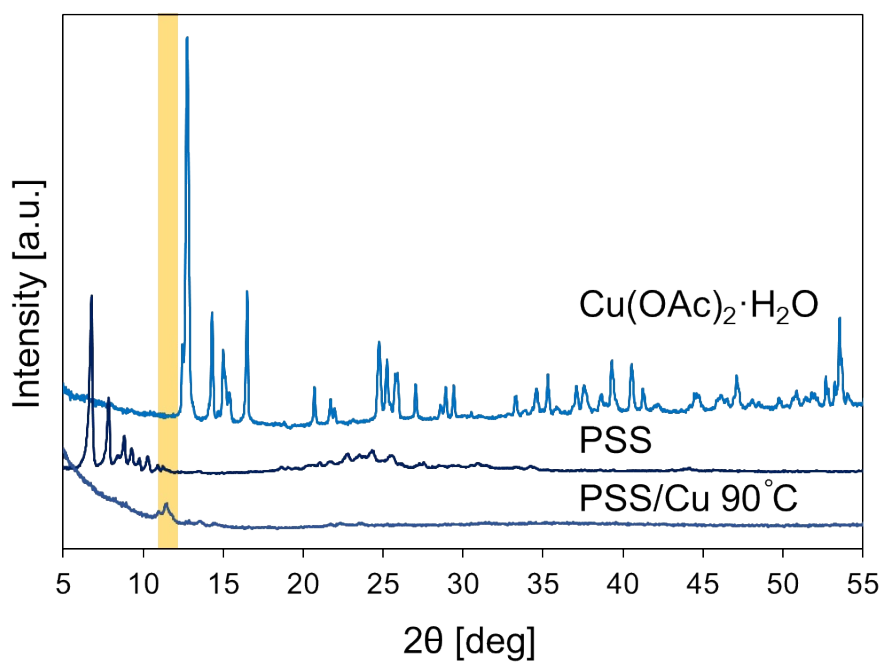

Fig. S3 XRD patterns for  $\text{Cu}(\text{OAc})_2 \cdot \text{H}_2\text{O}$ , PSS, and PSS/Cu  $90^\circ\text{C}$ .

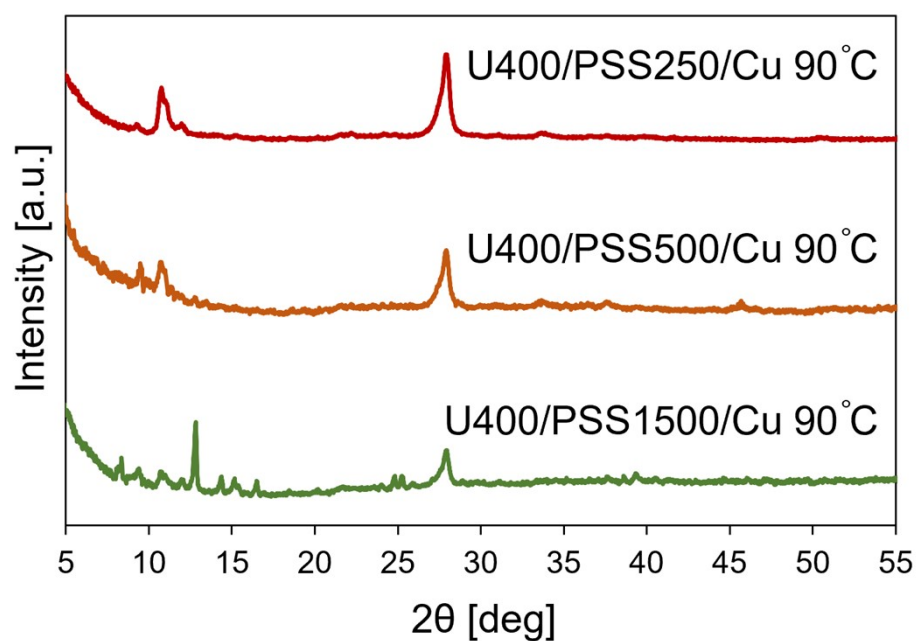

Fig. S4 XRD patterns for each U400/PSS $x$ /Cu  $90^\circ\text{C}$ .

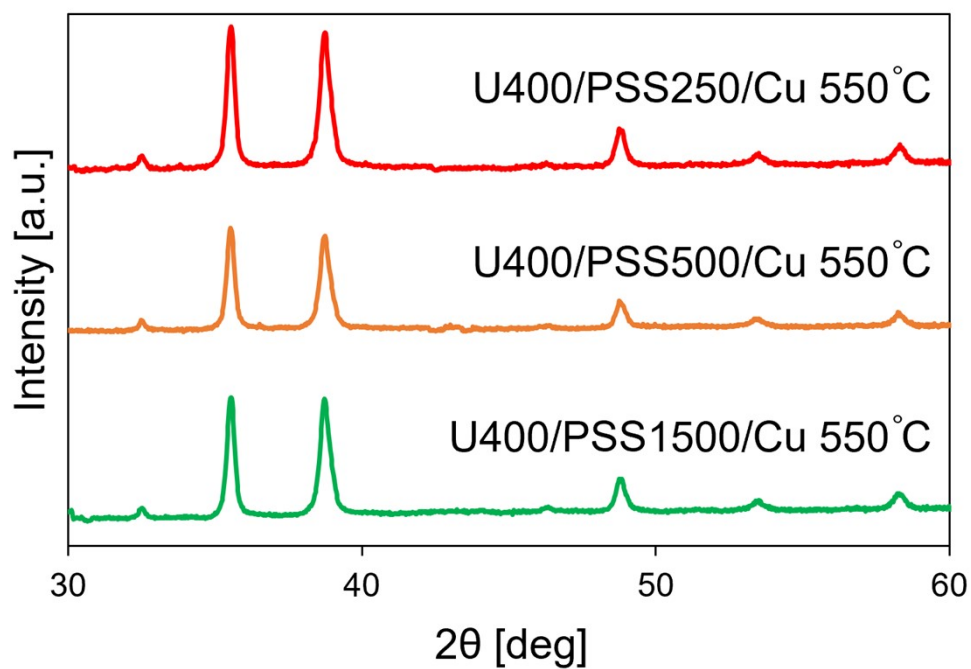

**Fig. S5** XRD patterns for each U400/PSSx/Cu 550°C.

**Table S1** Widths at half-maximum intensity of each peak in U400/PSS250/Cu 550°C and Cu(OAc)<sub>2</sub>·H<sub>2</sub>O 550°C.

|                                              | The peak at $2\theta = 36^\circ$<br>[°] | The peak at $2\theta = 39^\circ$<br>[°] |
|----------------------------------------------|-----------------------------------------|-----------------------------------------|
| U400/PSS250/Cu 550°C                         | 0.32                                    | 0.41                                    |
| Cu(OAc) <sub>2</sub> ·H <sub>2</sub> O 550°C | 0.29                                    | 0.31                                    |

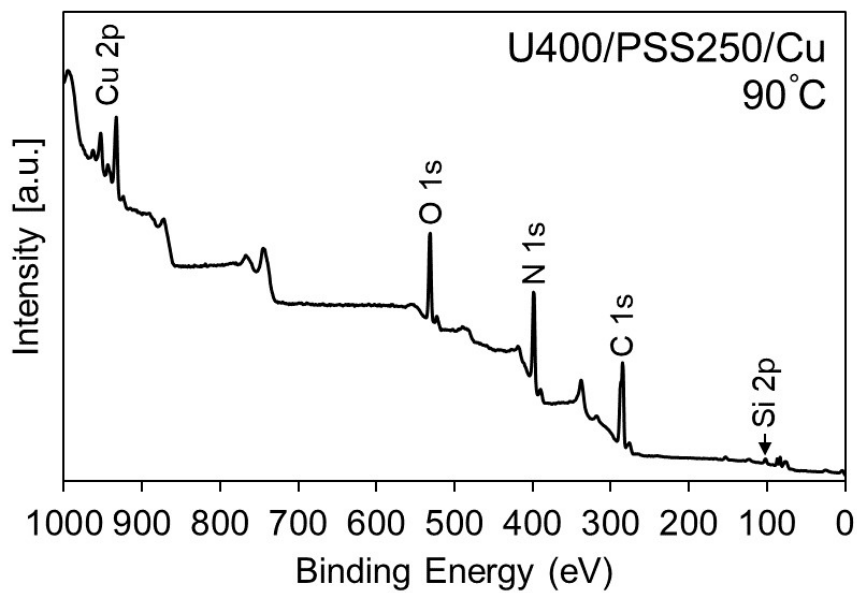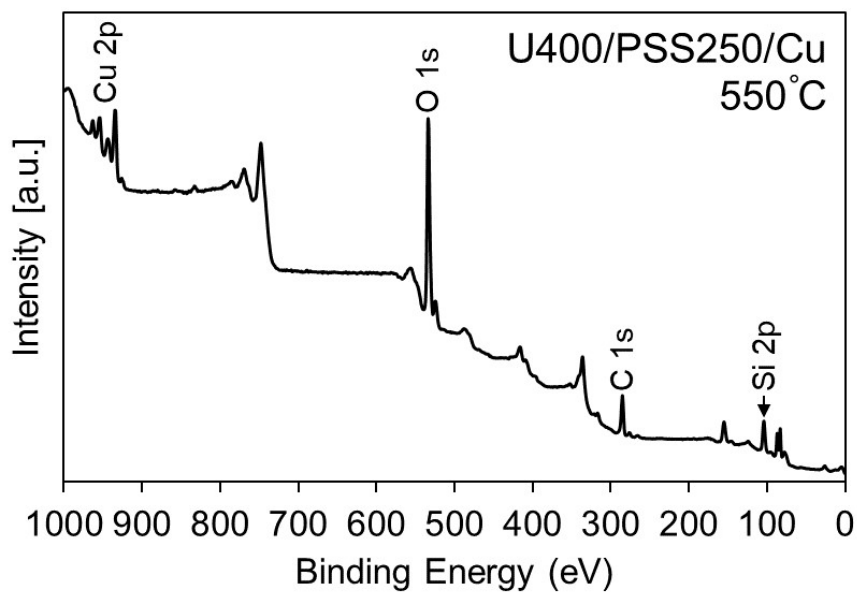

**Fig. S6** XPS survey scan for U400/PSS250/Cu 90°C and U400/PSS250/Cu 550°C.

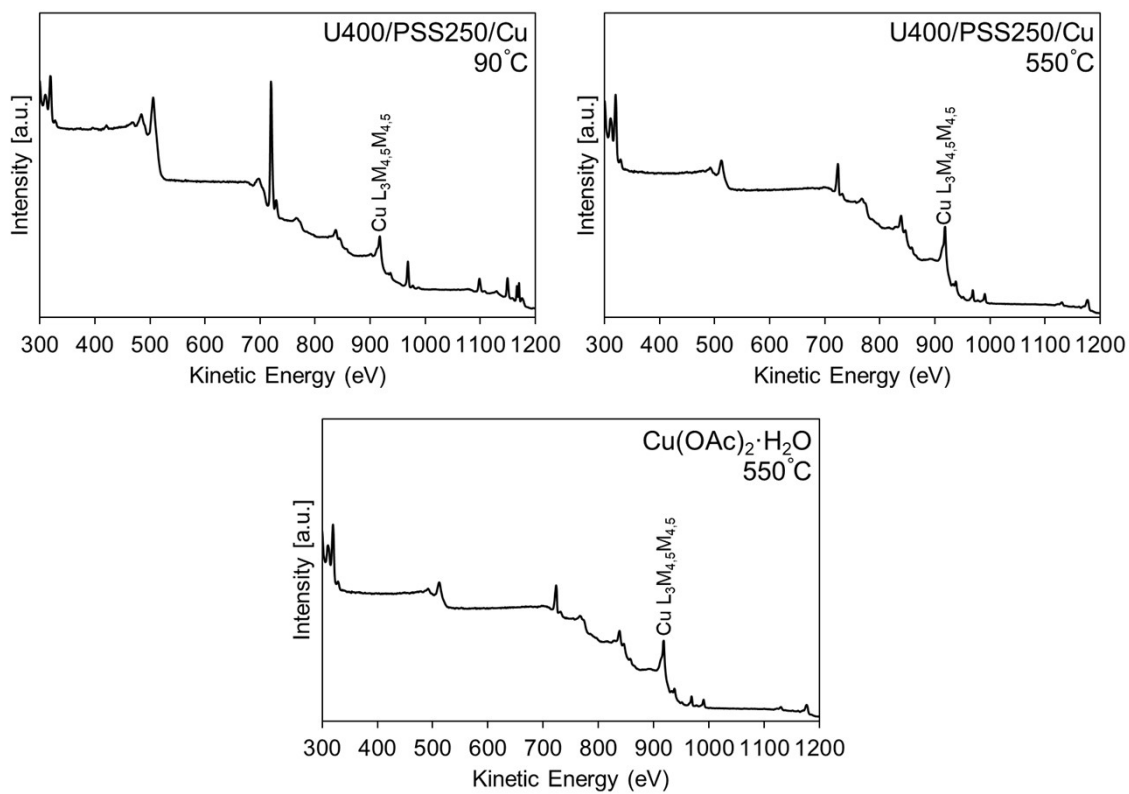

**Fig. S7** XPS survey scan for U400/PSS250/Cu 90°C, U400/PSS250/Cu 550°C, and Cu(OAc)<sub>2</sub>·H<sub>2</sub>O 550°C in kinetic energy scale.

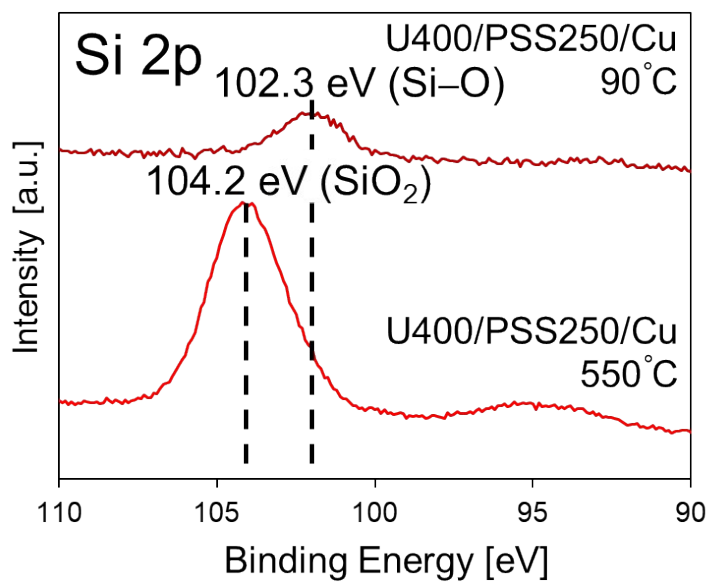

**Fig. S8** High-resolution XPS spectra in Si 2p region for U400/PSS250/Cu 90°C and U400/PSS250/Cu 550°C.

**Table S2** Calculated Auger parameters.

|                                              | Cu 2p <sub>3/2</sub><br>photoelectron peak<br>[eV] | Cu L <sub>3</sub> M <sub>4,5</sub> M <sub>4,5</sub><br>Auger peak<br>[eV] | Auger parameter<br>[eV] |
|----------------------------------------------|----------------------------------------------------|---------------------------------------------------------------------------|-------------------------|
| U400/PSS250/Cu 90°C                          | 933.04                                             | 915.44                                                                    | 1848.5                  |
| U400/PSS250/Cu 550°C                         | 934.08                                             | 917.70                                                                    | 1851.8                  |
| Cu(OAc) <sub>2</sub> ·H <sub>2</sub> O 550°C | 933.59                                             | 918.05                                                                    | 1851.6                  |

**Table S3** The element ratio of Si and Cu in U400/PSS250/Cu 550°C.



|          | <b>1</b> | <b>2</b> | <b>3</b> | <b>4</b> | <b>5</b>  |                |
|----------|----------|----------|----------|----------|-----------|----------------|
| Si [at%] | 43.81    | 44.41    | 38.32    | 46.58    | 46.77     |                |
| Cu [at%] | 56.19    | 55.59    | 61.68    | 53.42    | 53.23     |                |
|          | <b>6</b> | <b>7</b> | <b>8</b> | <b>9</b> | <b>10</b> | <b>Average</b> |
| Si [at%] | 46.86    | 48.01    | 50.91    | 45.75    | 47.33     | 45.9           |
| Cu [at%] | 53.14    | 51.99    | 49.09    | 54.25    | 52.67     | 54.1           |

**Table S4** The element ratio of Si and Cu in U400/PSS500/Cu 550°C.

|          | <b>1</b> | <b>2</b> | <b>3</b> | <b>4</b> | <b>5</b>  |                |
|----------|----------|----------|----------|----------|-----------|----------------|
| Si [at%] | 36.77    | 38.36    | 29.14    | 39.30    | 44.05     |                |
| Cu [at%] | 63.23    | 61.64    | 70.86    | 60.70    | 55.95     |                |
|          | <b>6</b> | <b>7</b> | <b>8</b> | <b>9</b> | <b>10</b> | <b>Average</b> |
| Si [at%] | 34.01    | 30.60    | 29.61    | 45.96    | 45.46     | 37.3           |
| Cu [at%] | 65.99    | 69.40    | 70.39    | 54.04    | 54.54     | 62.7           |

**Table S5** The element ratio of Si and Cu in U400/PSS1500/Cu 550°C.

|          | <b>1</b> | <b>2</b> | <b>3</b> | <b>4</b> | <b>5</b>  |                |
|----------|----------|----------|----------|----------|-----------|----------------|
| Si [at%] | 53.07    | 48.86    | 48.00    | 41.55    | 44.20     |                |
| Cu [at%] | 46.93    | 51.14    | 52.00    | 58.45    | 55.80     |                |
|          | <b>6</b> | <b>7</b> | <b>8</b> | <b>9</b> | <b>10</b> | <b>Average</b> |
| Si [at%] | 42.88    | 50.68    | 53.35    | 47.46    | 49.10     | 47.9           |
| Cu [at%] | 57.12    | 49.32    | 46.65    | 52.54    | 50.90     | 52.1           |

**Table S6** Experimental yields of U400/PSSx/Cu 550°C and theoretical yields of CuO and SiO<sub>2</sub>.

| Product name             | Precursors<br>(Before<br>calcination<br>550°C)<br>[mg] | Products<br>(After<br>calcination<br>550°C)<br>[mg] | Experimental<br>Yield<br>[%] | Theoretical<br>yield of CuO<br>and SiO <sub>2</sub><br>[%] |
|--------------------------|--------------------------------------------------------|-----------------------------------------------------|------------------------------|------------------------------------------------------------|
| U400/PSS250/Cu<br>550°C  | 987                                                    | 115                                                 | 11.7                         | 15.5                                                       |
| U400/PSS500/Cu<br>550°C  | 1449                                                   | 280                                                 | 19.3                         | 22.5                                                       |
| U400/PSS1500/Cu<br>550°C | 1705                                                   | 516                                                 | 30.3                         | 32.3                                                       |

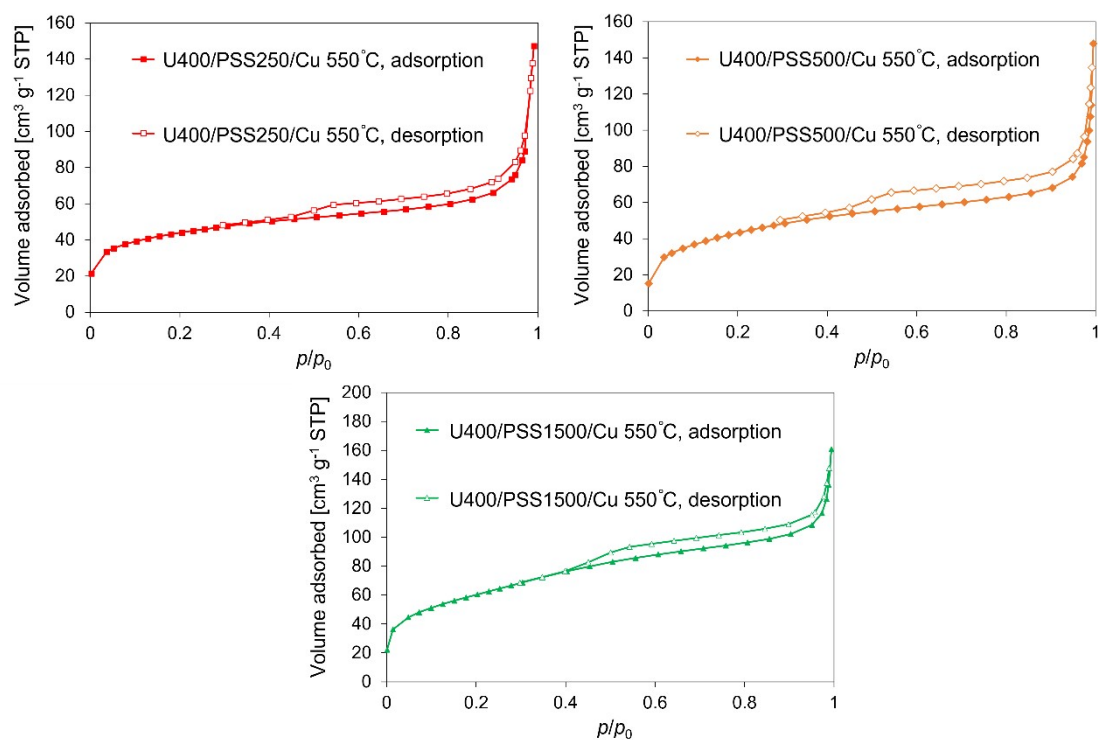**Fig. S9** N<sub>2</sub> adsorption–desorption isotherms of each U400/PSSx/Cu 550°C.

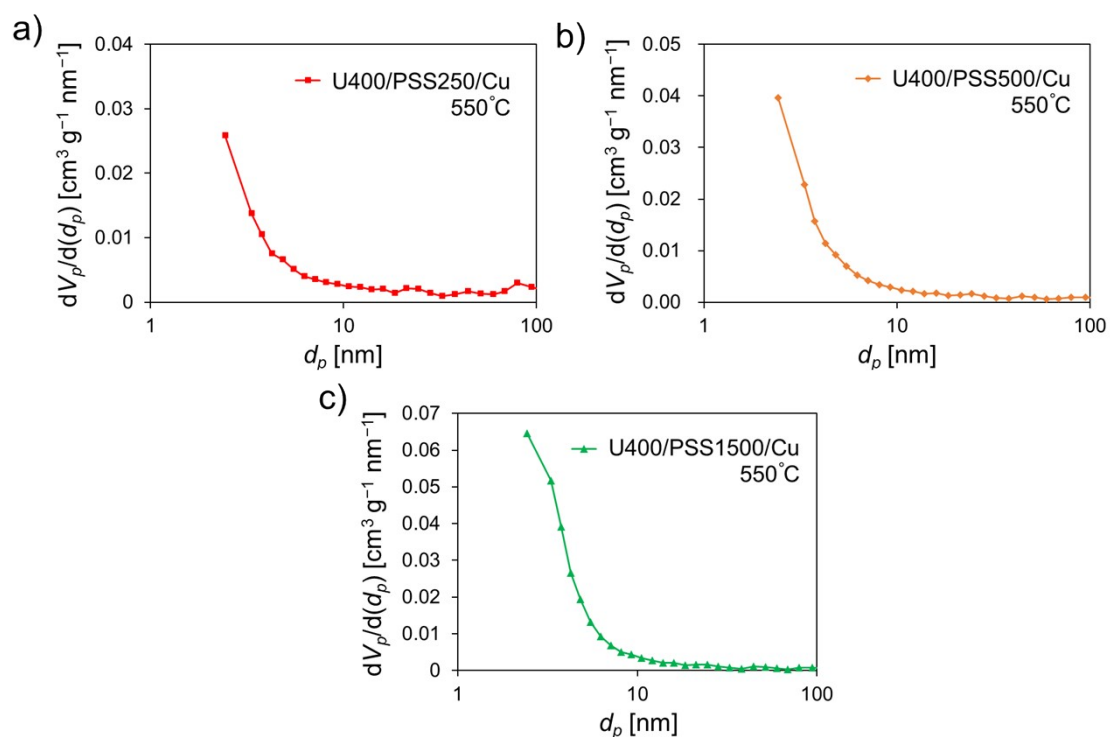

**Fig. S10** BJH pore size distributions of a) U400/PSS250/Cu 550°C, b) U400/PSS500/Cu 550°C, and c) U400/PSS1500/Cu 550°C.

**Table S7** Specific surface areas of each material.

|                                              | Specific surface area<br>[m <sup>2</sup> g <sup>-1</sup> ] |
|----------------------------------------------|------------------------------------------------------------|
| U400/PSS250/Cu 550°C                         | 157                                                        |
| U400/PSS500/Cu 550°C                         | 153                                                        |
| U400/PSS1500/Cu 550°C                        | 214                                                        |
| Cu(OAc) <sub>2</sub> ·H <sub>2</sub> O 550°C | 1                                                          |

**Table S8** Comparative table from the literature in porosity.

|                                            | Method                                                                                           | Specific surface area<br>[m <sup>2</sup> g <sup>-1</sup> ] | Ref.          |
|--------------------------------------------|--------------------------------------------------------------------------------------------------|------------------------------------------------------------|---------------|
| CuO nanochains                             | Wet chemical route using polyethylene glycol as a soft template                                  | 123.1                                                      | 1             |
| CuO nanosheets clusters                    | Hydrothermal method with/without surfactants                                                     | 75.40, 95.31, 93.87                                        | 2             |
| CuO hollow microspheres                    | Carbon spheres used as templates                                                                 | 74.81                                                      | 3             |
| Porous CuO                                 | Calcination of metal–organic frameworks                                                          | 69.57, 89.18                                               | 4             |
| CuO ultrathin nanobelts                    | Wet chemical method combined with a fast calcination strategy                                    | 109.13                                                     | 5             |
| Mesoporous CuO dandelion Structures        | Hydrothermal route                                                                               | 325                                                        | 6             |
| Porous CuO                                 | Calcination process via the chemical solution deposition to prepare the copper oxalate precursor | 165, 193, 295                                              | 7             |
| CuO/SiO <sub>2</sub> composites            | Solution exchange of wet silica gel (CuO content: 30 wt%)                                        | 158                                                        | 8             |
| Hollow CuO@SiO <sub>2</sub> spheres        | Template method using Cu@C composite as a hard template (Cu content: 26 wt%)                     | 85                                                         | 9             |
| Porous CuO–SiO <sub>2</sub> nanocomposites | Structure-directing synthesis via calcination                                                    | 153, 157, 214                                              | In this study |

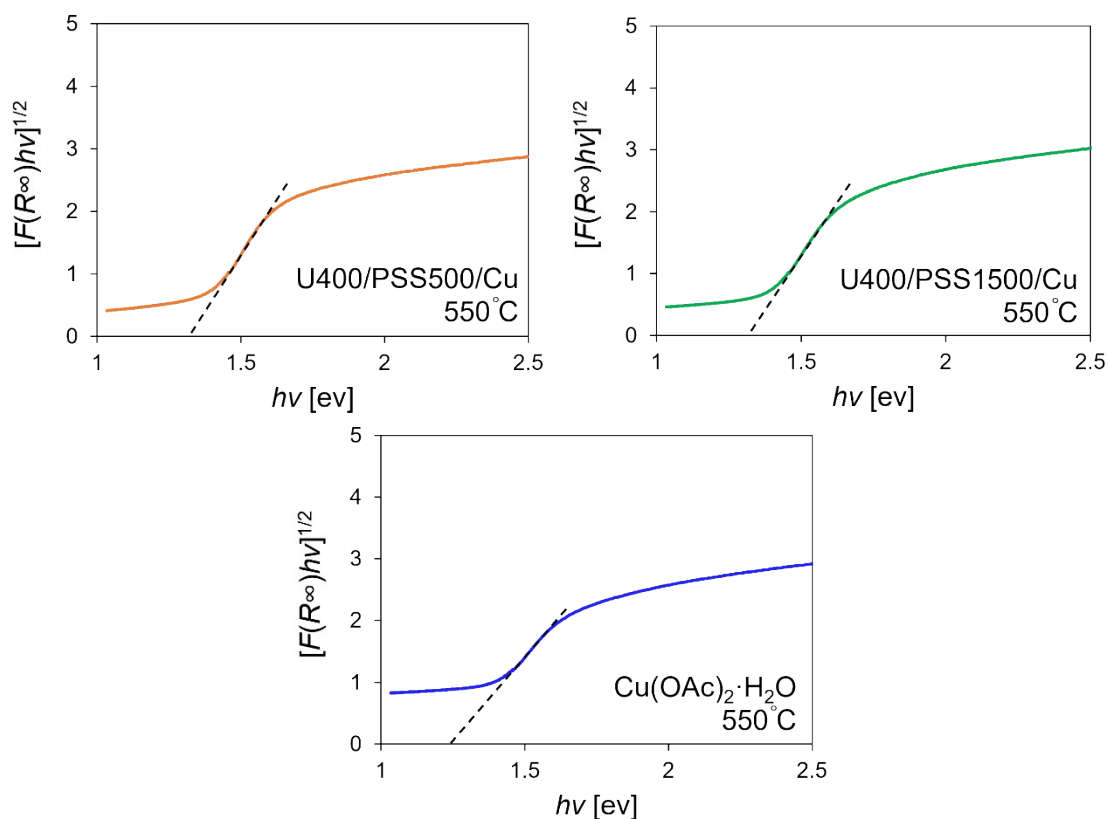

**Fig. S11** Optical band gaps of U400/PSS500/Cu 550°C, U400/PSS1500/Cu 550°C, and Cu(OAc)<sub>2</sub>·H<sub>2</sub>O 550°C determined with the plots of  $[F(R^\infty)hv]^{1/2}$  versus photon energy ( $h\nu$ ).

**Table S9** Comparative table from the literature in band gap.

|                                                      | Band gap<br>[eV] | Ref.          |
|------------------------------------------------------|------------------|---------------|
| CuO–ZnO core–shell nanowire                          | 1.5–1.6          | 10            |
| CuO@TiO <sub>2</sub> heterostructure<br>composite    | 2.35             | 11            |
| CuO/CuFe <sub>2</sub> O <sub>4</sub> nanocomposites  | 1.37–1.72        | 12            |
| Core/shell nanoparticles of<br>SiO <sub>2</sub> @CuO | 2.63–4.20        | 13            |
| CuO/SiO <sub>2</sub> monolith                        | 1.33             | 14            |
| Porous CuO–SiO <sub>2</sub>                          | 1.3              | In this study |

**Table S10** The element ratio of Si and Cu in PSS/Cu 550°C.

|          | <b>1</b> | <b>2</b> | <b>3</b> | <b>4</b> | <b>5</b>  |                |
|----------|----------|----------|----------|----------|-----------|----------------|
| Si [at%] | 0        | 0        | 0        | 11.48    | 7.39      |                |
| Cu [at%] | 100      | 100      | 100      | 88.52    | 92.61     |                |
|          | <b>6</b> | <b>7</b> | <b>8</b> | <b>9</b> | <b>10</b> | <b>Average</b> |
| Si [at%] | 0        | 0        | 6.61     | 10.06    | 4.77      | 4.03           |
| Cu [at%] | 100      | 100      | 93.39    | 89.94    | 95.23     | 95.97          |

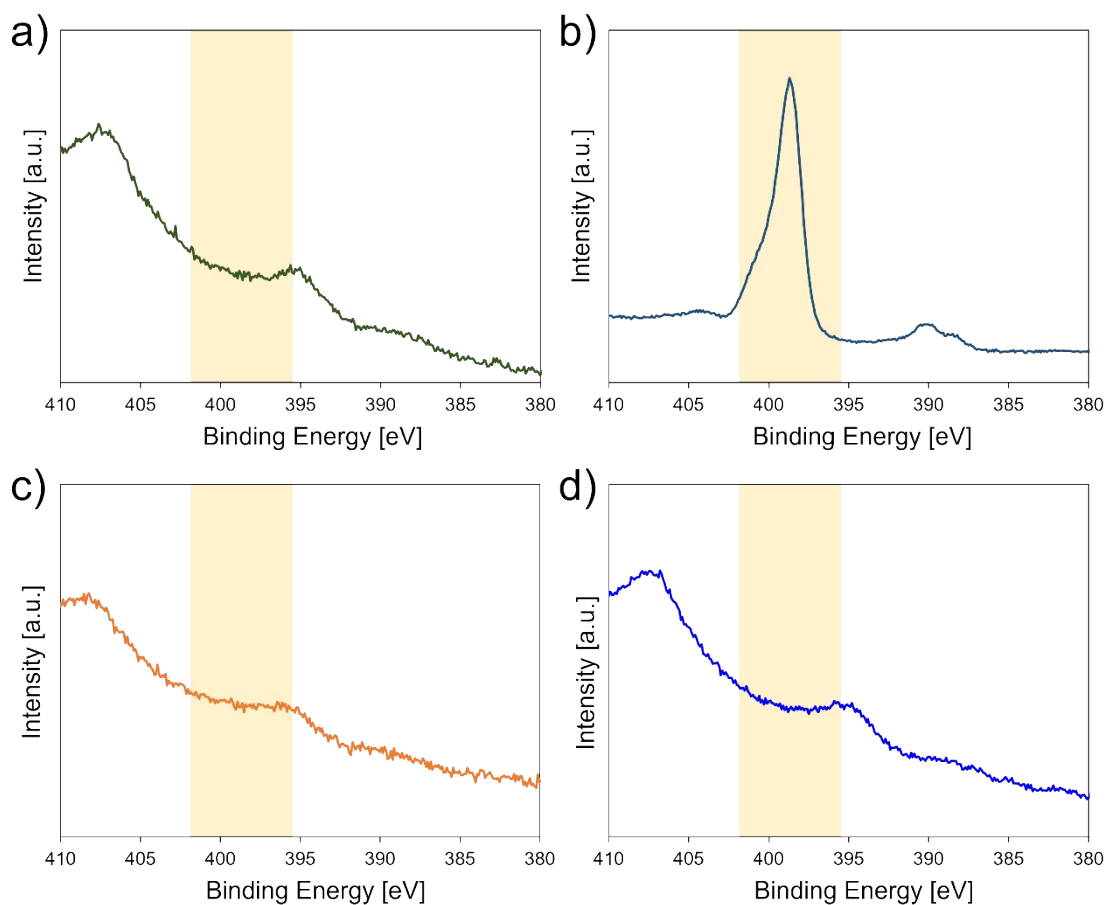**Fig. S12** High-resolution XPS spectra in the N 1s region for a) U400/Cu 550°C, b) U400/PSS 550°C, c) U400/PSS500/Cu 550°C, and d) the background ( $\text{Cu}(\text{OAc})_2 \cdot \text{H}_2\text{O}$  550°C).

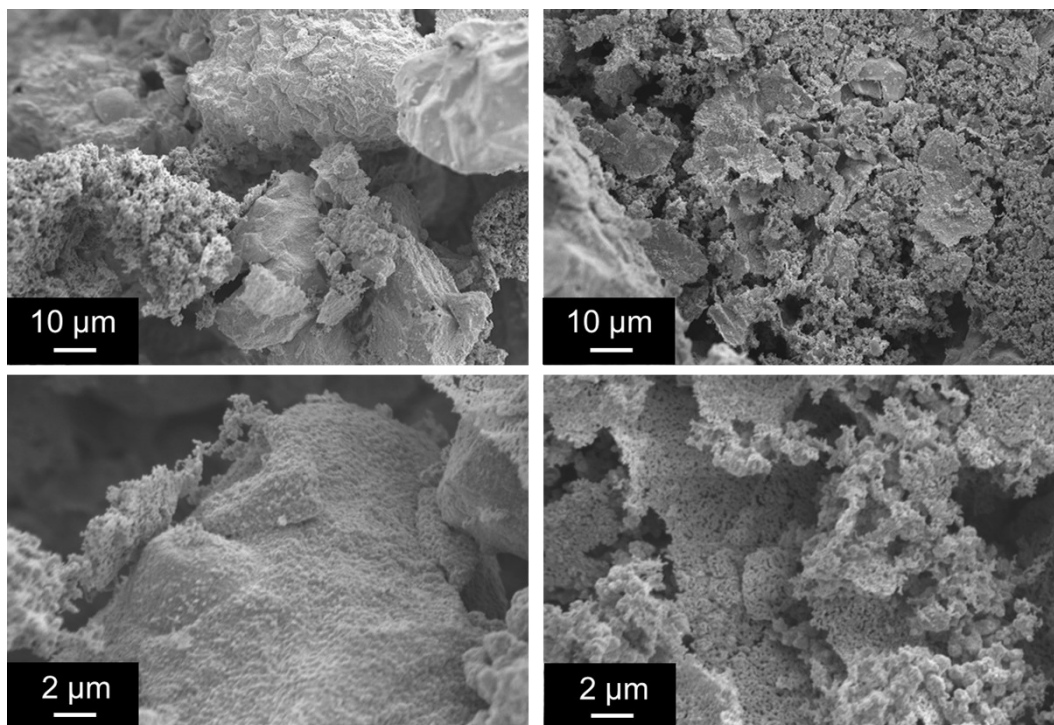

**Fig. S13** SEM images of  $\text{Cu}(\text{OAc})_2 \cdot \text{H}_2\text{O}$  550°C.

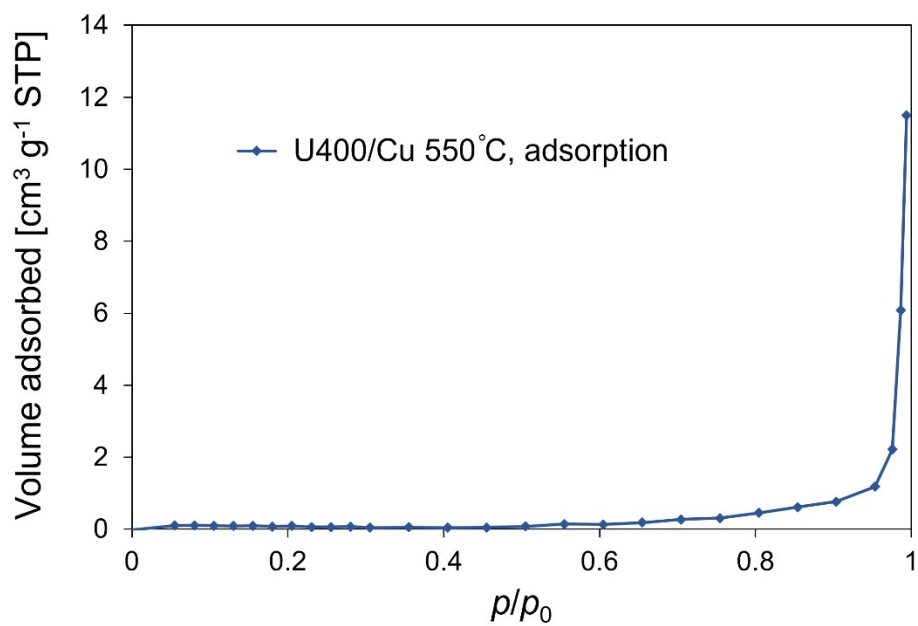

**Fig. S14** The  $\text{N}_2$  adsorption isotherm of U400/Cu 550°C.

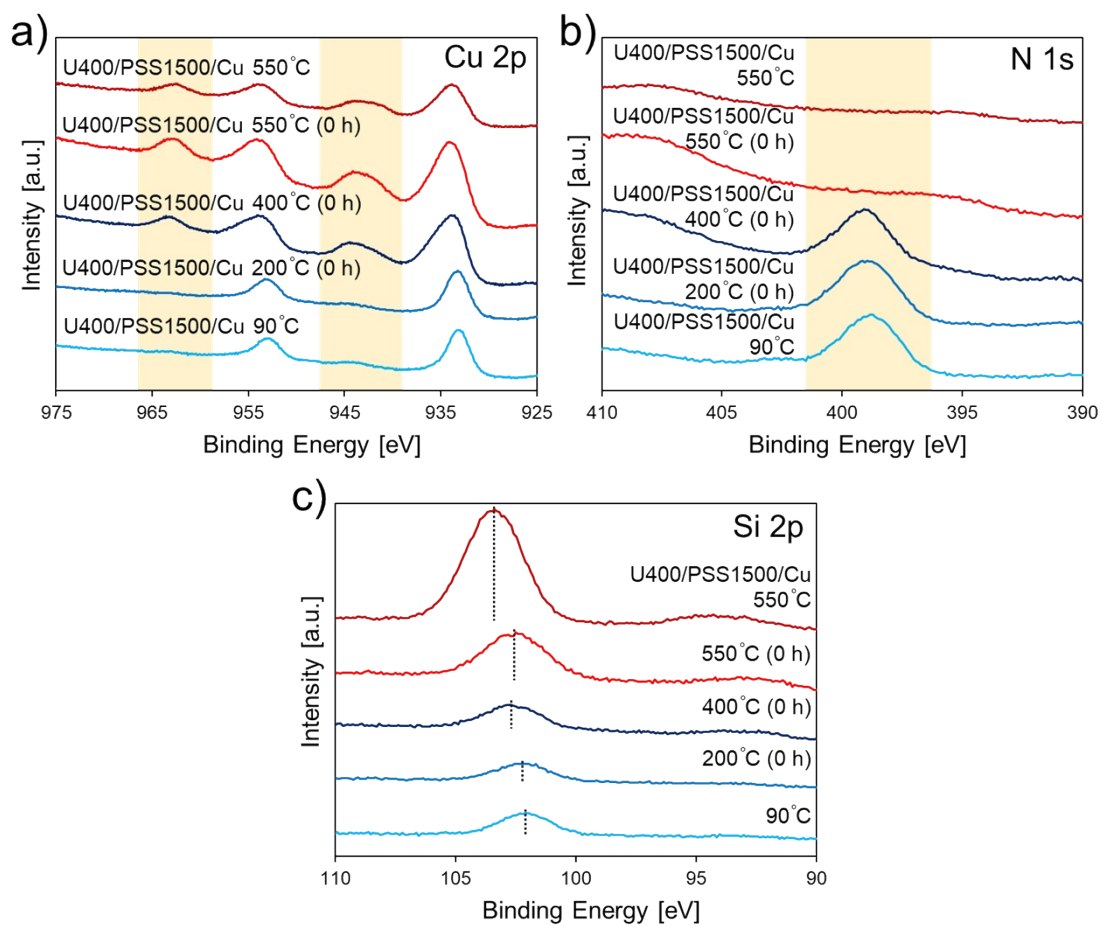

**Fig. S15** High-resolution XPS spectra in a) Cu 2p region, b) N 1s region, and c) Si 2p region for U400/PSS1500/Cu 90°C and the samples obtained by calcinating U400/PSS1500/Cu 90°C at different conditions.



## References

1. P. Wang, X.-X. Gou, S. Xin and F.-F. Cao, *New J. Chem.*, 2019, **43**, 6535–6539.
2. G. S. Gund, D. P. Dubal, D. S. Dhawale, S. S. Shinde and C. D. Lokhande, *RSC Adv.*, 2013, **3**, 24099–24107.
3. Q. Shao, X. Wang, Q. Liu, L. Wang, C. Kang, Q. Wang and S. Ge, *J. Nanosci. Nanotechnol.*, 2011, **11**, 10271–10277.
4. K. Kim, P. G. Choi, T. Itoh and Y. Masuda, *Adv. Mater. Interfaces*, 2021, **8**, 2100283.
5. Q. Wang, Y. Zhou, K. Zhang, Y. Yu, Q. Luo, S. Gao and Y. Xie, *J. Mater. Chem. A*, 2023, **11**, 8776–8782.
6. S. Manna, K. Das and S. K. De, *ACS Appl. Mater. Interfaces*, 2010, **2**, 1536–1542.
7. Z. Jia, L. Yue, Y. Zheng and Z. Xu, *Mater. Res. Bull.*, 2008, **43**, 2434–2440.
8. R. Takahashi, S. Sato, T. Sodesawa, M. Kato and S. Yoshida, *J. Sol–Gel Sci. Technol.*, 2000, **19**, 715–718.
9. X. Niu, T. Zhao, F. Yuan and Y. Zhu, *Sci. Rep.*, 2015, **5**, 9153.
10. A. Costas, C. Florica, N. Preda, C. Besleaga, A. Kuncser and I. Enculescu, *Sci. Rep.*, 2022, **12**, 6834.
11. H. Hamad, M. M. Elsenety, W. Sadik, A.-G. El-Demerdash, A. Nashed, A. Mostafa and S. Elyamny, *Sci. Rep.*, 2022, **12**, 2217.
12. M. M. Rashad, S. Soltan, A. A. Ramadan, M. F. Bekheet and D. A. Rayan, *Ceram. Int.*, 2015, **41**, 12237–12245.
13. Z. Rahimabadi, M. M. Bagheri-Mohagheghi and A. Shirpay, *J. Mater. Sci. Mater. Electron.*, 2022, **33**, 7765–7780.
14. S. Sharma and S. Basu, *Sep. Purif. Technol.*, 2021, **279**, 119759.
